# Supplementary material for: Unveiling the potential of HSPA4: a comprehensive pan-cancer analysis of HSPA4 in diagnosis, prognosis, and immunotherapy
Source: publisher site journal article supplement (doi:10.18632/aging.205496), 2024-01-31
Supplement: Supplementary file [file aging-v16i3-205496-supplementary-material-SD2.pdf]

## SUPPLEMENTARY TABLE

**Supplementary Table 1. Abbreviations of cancers.**

| <b>Abbreviations</b> | <b>Full name</b>                                                 |
|----------------------|------------------------------------------------------------------|
| BRCA                 | Breast invasive carcinoma                                        |
| BLCA                 | Bladder urothelial carcinoma                                     |
| CESC                 | Cervical squamous cell carcinoma and endocervical adenocarcinoma |
| COAD                 | Colon adenocarcinoma                                             |
| CHOL                 | Cholangiocarcinoma                                               |
| DLBC                 | Diffuse large B-cell lymphoma                                    |
| ESAD                 | Esophageal Adenocarcinoma                                        |
| ESCA                 | Esophageal carcinoma                                             |
| GBM                  | Glioblastoma multiforme                                          |
| HNSC                 | Head and neck squamous cell carcinoma                            |
| KIRC                 | Kidney renal clear cell carcinoma                                |
| KICH                 | Kidney chromophobe                                               |
| KIRP                 | Kidney renal papillary cell carcinoma                            |
| LGG                  | Brain Lower Grade Glioma                                         |
| LIHC                 | Liver hepatocellular carcinoma                                   |
| LUAD                 | Lung adenocarcinoma                                              |
| LUSC                 | Lung squamous cell carcinoma                                     |
| OSCC                 | Oral squamous cell carcinoma                                     |
| PAAD                 | Pancreatic adenocarcinoma                                        |
| READ                 | Rectum adenocarcinoma                                            |
| PRAD                 | Prostate adenocarcinoma                                          |
| STAD                 | Stomach adenocarcinoma                                           |
| THCA                 | Thyroid carcinoma                                                |
| THYM                 | Thymoma                                                          |
| TGCT                 | Testicular germ cell tumors                                      |
| UCEC                 | Uterine corpus endometrial carcinoma                             |
